# Supplementary material
Source: MDPI journal article supplement (https://www.mdpi.com/2073-445X/10/4/429)
Supplement: s1 [file s1]

## SUPPLEMENTARY MATERIAL

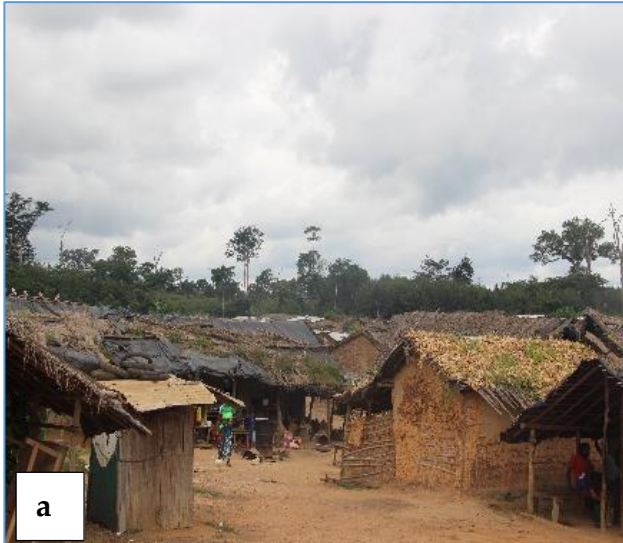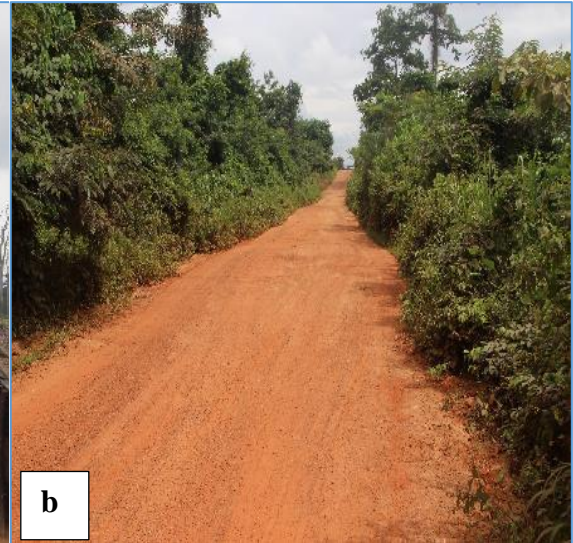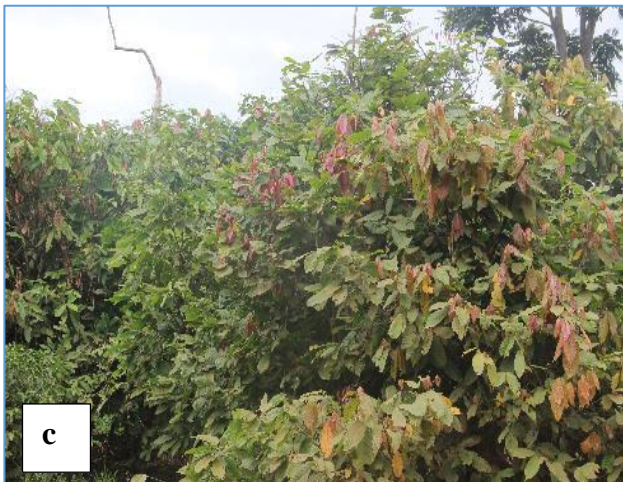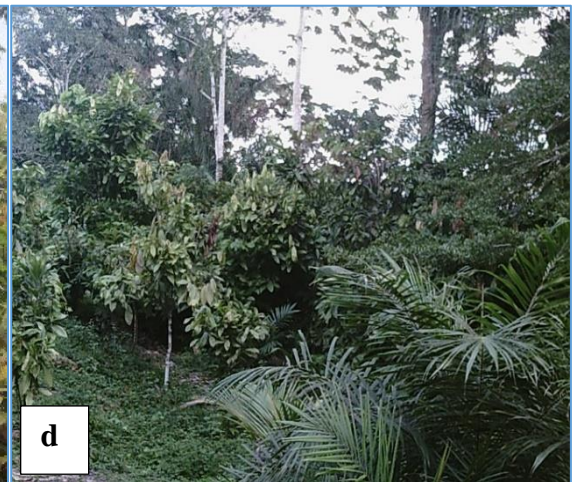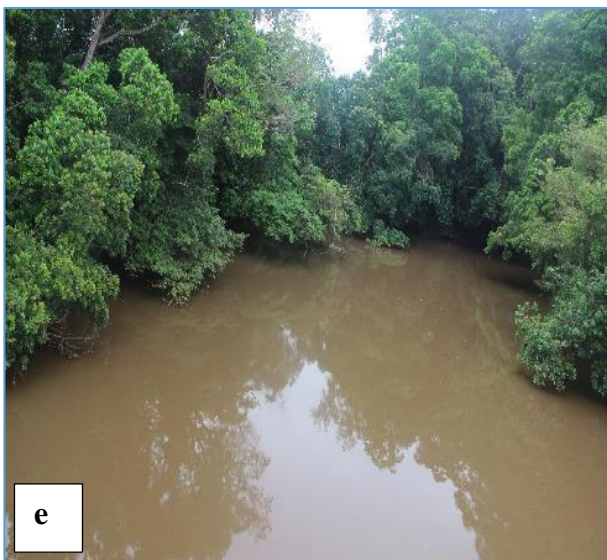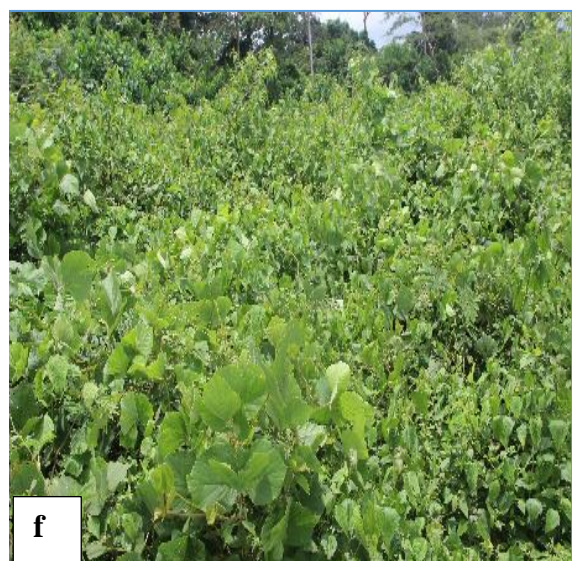



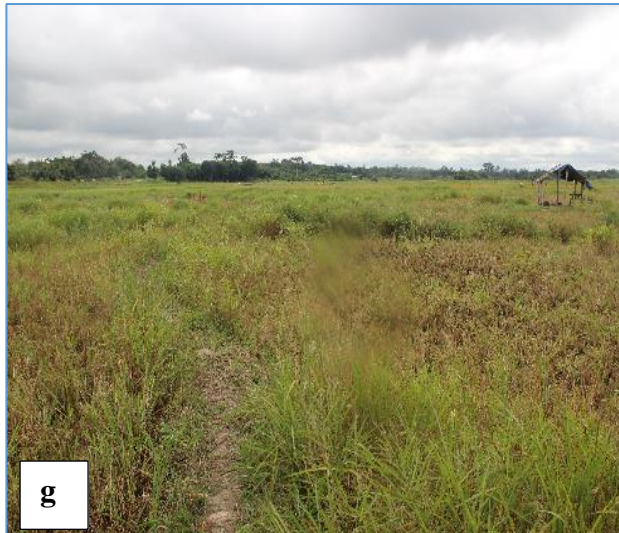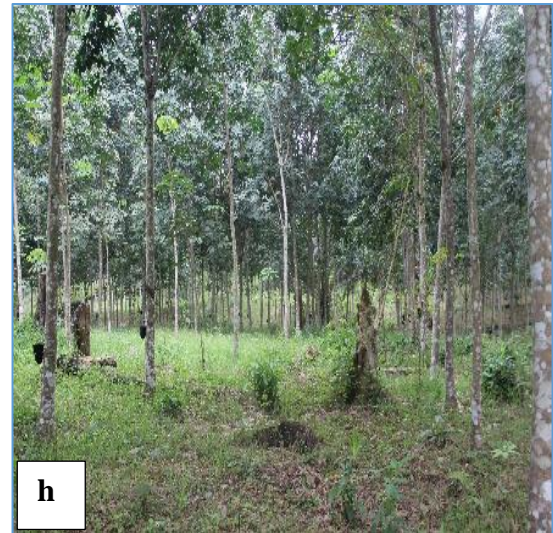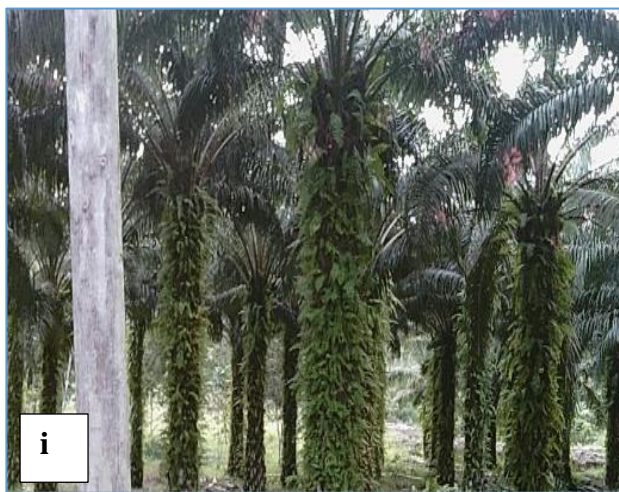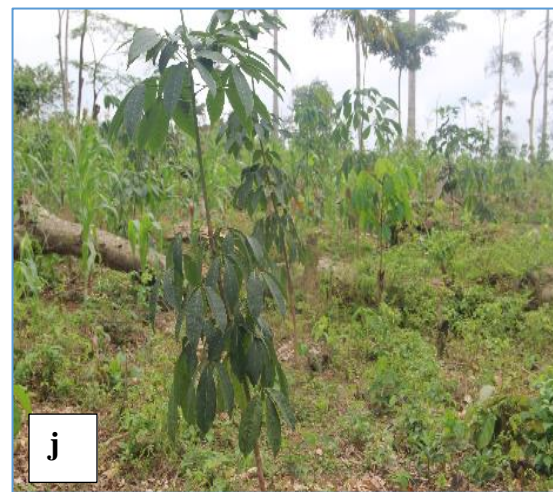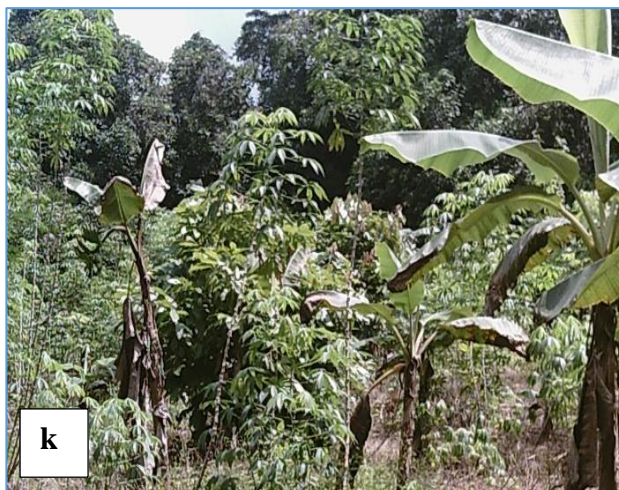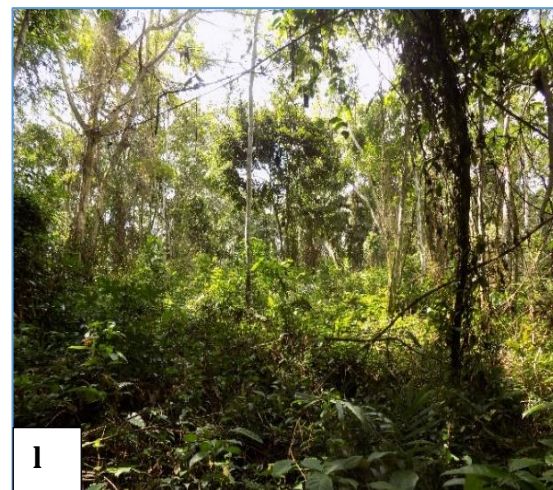

*a)* habited area, *b)* dirty road, *c* & *d)* cocoa plots, *e)* waterbody, *f)* fallow, *g)* rice plot, *h)* rubber plantation, *i)* oil palm, *j)* young rubber plantation, *k)* mixed food crops, *l)* degraded forest

Figure S1. Photographs of visited land uses in the Espace Tai

Table S1. LULC change trends in different forest management domains in the Upper Espace Tai Region over the period 1987-2015 in south-western Cote d'Ivoire

| LULC type                                  | 1987                    |       | 2015                    |       | Net change      |                       | Annual rate (%) |
|--------------------------------------------|-------------------------|-------|-------------------------|-------|-----------------|-----------------------|-----------------|
|                                            | Area (km <sup>2</sup> ) | %     | Area (km <sup>2</sup> ) | %     | km <sup>2</sup> | km <sup>2</sup> /year |                 |
| Protected area = 3,667.4 km <sup>2</sup>   |                         |       |                         |       |                 |                       |                 |
| Dense forests                              | 3,503.02                | 95.52 | 3,503.58                | 95.53 | 0.56            | 0.02                  | 0.00            |
| Degraded forests                           | 21.82                   | 0.59  | 19.77                   | 0.54  | -2.05           | -0.07                 | -0.35           |
| Rubber plantations                         | 0.00                    | 0.00  | 1.69                    | 0.05  | 1.69            | 0.06                  | 26.55           |
| Other cash crops                           | 26.25                   | 0.72  | 48.15                   | 1.31  | 21.91           | 0.78                  | 2.17            |
| Food crops - fallows                       | 30.84                   | 0.84  | 14.11                   | 0.38  | -16.73          | -0.60                 | -2.79           |
| Waterbodies                                | 84.46                   | 2.30  | 78.70                   | 2.15  | -5.76           | -0.21                 | -0.25           |
| Settlements                                | 1.00                    | 0.03  | 1.16                    | 0.03  | 0.16            | 0.01                  | 0.53            |
| Wetlands                                   | 0.02                    | 0.00  | 0.23                    | 0.01  | 0.21            | 0.01                  | 9.48            |
| Gazetted forest = 1,555.65 km <sup>2</sup> |                         |       |                         |       |                 |                       |                 |
| Dense forests                              | 1,459.01                | 93.79 | 588.53                  | 37.85 | -870.49         | -31.09                | -3.24           |
| Degraded forests                           | 20.99                   | 1.35  | 202.35                  | 13.01 | 181.36          | 6.48                  | 8.09            |
| Rubber plantations                         | 0.68                    | 0.04  | 8.04                    | 0.52  | 7.36            | 0.26                  | 8.81            |
| Other cash crops                           | 25.50                   | 1.64  | 280.96                  | 18.07 | 255.45          | 9.12                  | 8.57            |
| Food crops - fallows                       | 47.54                   | 3.06  | 468.38                  | 30.12 | 420.83          | 15.03                 | 8.17            |
| Waterbodies                                | 1.53                    | 0.10  | 2.12                    | 0.14  | 0.59            | 0.02                  | 1.17            |
| Settlements                                | 0.37                    | 0.02  | 4.46                    | 0.29  | 4.09            | 0.15                  | 8.87            |
| Wetlands                                   | 0.02                    | 0.00  | 0.81                    | 0.05  | 0.79            | 0.03                  | 13.25           |
| Rural area = 5,528.23 km <sup>2</sup>      |                         |       |                         |       |                 |                       |                 |
| Dense forests                              | 1,290.12                | 23.34 | 88.47                   | 1.60  | -1,201.65       | -42.92                | -9.57           |
| Degraded forests                           | 670.79                  | 12.13 | 58.53                   | 1.06  | -612.26         | -21.87                | -8.71           |
| Rubber plantations                         | 25.54                   | 0.46  | 175.47                  | 3.17  | 149.93          | 5.35                  | 6.88            |
| Other cash crops                           | 2,028.64                | 36.70 | 2,090.07                | 37.81 | 61.43           | 2.19                  | 0.11            |
| Food crops - fallows                       | 1,056.00                | 19.10 | 2,445.82                | 44.24 | 1,389.82        | 49.64                 | 3.00            |
| Waterbodies                                | 431.16                  | 7.80  | 414.23                  | 7.49  | -16.93          | -0.60                 | -0.14           |
| Settlements                                | 24.02                   | 0.43  | 177.48                  | 3.21  | 153.46          | 5.48                  | 7.14            |
| Wetlands                                   | 1.95                    | 0.04  | 78.14                   | 1.41  | 76.19           | 2.72                  | 13.18           |

Table S2. Socioeconomic determinants affecting respondents good perception of the trend of cultivated lands

| Explanatory variables               | Model summary |           |         | Marginal effects |           |         |
|-------------------------------------|---------------|-----------|---------|------------------|-----------|---------|
|                                     | Estimate      | Std Error | p-value | AME              | Std Error | p-value |
| Constant                            | 38.068***     | 0.997     | 0.000   |                  |           |         |
| Age of respondent                   | 1.071*        | 0.031     | 0.029   | 0.003*           | 0.002     | 0.040   |
| Household head (1-Yes)              | 0.074*        | 1.118     | 0.020   | -0.087**         | 0.03      | 0.004   |
| Household head age (2- 30–60 years) | 0.282         | 0.808     | 0.117   | -0.044           | 0.024     | 0.070   |
| Household head age (3- 60–90 years) | 0.042*        | 1.417     | 0.025   | -0.251           | 0.154     | 0.104   |
| Pseudo R <sup>2</sup> (Nagelkerke)  | 0.071         |           |         |                  |           |         |
| Prob > Chi <sup>2</sup>             | 0.043         |           |         |                  |           |         |

Number of observations: 359; AME = Average Marginal Effects, \* $p < 0.05$ , \*\* $p < 0.01$  and \*\*\* $p < 0.001$

Table S3. Socioeconomic determinants affecting respondents good perception of the trend of cultivated lands

| Explanatory variables                    | Model summary        |           |         | Marginal effects |           |         |
|------------------------------------------|----------------------|-----------|---------|------------------|-----------|---------|
|                                          | Estimate             | Std Error | p-value | AME              | Std Error | p-value |
| Constant                                 | 4.908***             | 0.381     | 0.000   |                  |           |         |
| Origin (1-Foreigners)                    | 0.623                | 0.276     | 0.086   | -0.088           | 0.05      | 0.078   |
| Origin (2-Native)                        | 9.853*               | 1.049     | 0.029   | 0.194***         | 0.045     | 0.000   |
| Household head education (1-Primary)     | 0.562                | 0.333     | 0.084   | -0.109           | 0.067     | 0.101   |
| Household head education (2- Secondary)  | 0.562                | 0.421     | 0.171   | -0.109           | 0.085     | 0.200   |
| Household head education (3- University) | 1.81×10 <sup>6</sup> | 582.90    | 0.980   | 0.227***         | 0.026     | 0.000   |
| Household size                           | 0.966                | 0.022     | 0.104   | -0.006           | 0.004     | 0.100   |
| Cultivated food crops                    | 0.947                | 0.032     | 0.089   | -0.01            | 0.006     | 0.085   |
| Cultivated cash crops                    | 1.256                | 0.131     | 0.083   | 0.04             | 0.023     | 0.078   |
| Pseudo R <sup>2</sup> (Nagelkerke)       | 0.001                |           |         |                  |           |         |
| Prob > Chi <sup>2</sup>                  | 0.001                |           |         |                  |           |         |

Number of observations: 359; AME = Average Marginal Effects, \* $p < 0.05$ , \*\* $p < 0.01$  and \*\*\* $p < 0.001$

Table S4. Socioeconomic determinants affecting respondents good perception of the trend of grasslands

| Explanatory variables                  | Model summary |           |         | Marginal effects |           |         |
|----------------------------------------|---------------|-----------|---------|------------------|-----------|---------|
|                                        | Estimate      | Std Error | p-value | AME              | Std Error | p-value |
| Constant                               | 2.158*        | 0.371     | 0.038   |                  |           |         |
| Age of household head (2- 30–60 years) | 0.983         | 0.286     | 0.953   | -0.004           | 0.067     | 0.953   |
| Age of household head (3- 60–90 years) | 2.127         | 0.448     | 0.092   | 0.16             | 0.09      | 0.076   |
| Cultivated food crops                  | 1.061*        | 0.029     | 0.040   | 0.014*           | 0.007     | 0.036   |
| Holding cocoa farm (1-Yes)             | 0.447*        | 0.327     | 0.014   | -0.172**         | 0.062     | 0.006   |
| Pseudo R <sup>2</sup> (Nagelkerke)     | 0.046         |           |         |                  |           |         |
| Prob > Chi <sup>2</sup>                | 0.015         |           |         |                  |           |         |

Number of observations: 359; AME = Average Marginal Effects, \* $p < 0.05$ , \*\* $p < 0.01$  and \*\*\* $p < 0.001$

Table S5. Socioeconomic determinants affecting respondents good perception of the trend of shrublands

| Explanatory variables              | Model summary |           |         | Marginal effects |           |         |
|------------------------------------|---------------|-----------|---------|------------------|-----------|---------|
|                                    | Estimate      | Std Error | p-value | AME              | Std Error | p-value |
| Constant                           | 0.329**       | 0.371     | 0.003   |                  |           |         |
| Household size                     | 0.932*        | 0.034     | 0.040   | -0.009*          | 0.005     | 0.039   |
| Cultivated food crops              | 1.093**       | 0.034     | 0.009   | 0.012**          | 0.004     | 0.009   |
| Holding cocoa farm (1-Yes)         | 0.559         | 0.380     | 0.125   | -0.086           | 0.062     | 0.164   |
| Pseudo R <sup>2</sup> (Nagelkerke) | 0.053         |           |         |                  |           |         |
| Prob > Chi <sup>2</sup>            | 0.009         |           |         |                  |           |         |

Number of observations: 359; AME = Average Marginal Effects, \* $p < 0.05$ , \*\* $p < 0.01$  and \*\*\* $p < 0.001$

Table S6. Socioeconomic determinants affecting respondents good perception of the trend of woodlands

| Explanatory variables                   | Model summary        |           |         | Marginal effects |           |         |
|-----------------------------------------|----------------------|-----------|---------|------------------|-----------|---------|
|                                         | Estimate             | Std Error | p-value | AME              | Std Error | p-value |
| Constant                                | 4.998**              | 0.545     | 0.003   |                  |           |         |
| Household head (1-Yes)                  | 2.467*               | 0.380     | 0.018   | 0.085*           | 0.04      | 0.035   |
| Age of household head (2- 30–60 years)  | 1.126                | 0.504     | 0.813   | 0.011            | 0.049     | 0.818   |
| Age of household head (3- 60–90 years)  | 7.833                | 1.149     | 0.073   | 0.101*           | 0.049     | 0.038   |
| Household head education (1-Primary)    | 1.148                | 0.467     | 0.767   | 0.012            | 0.041     | 0.761   |
| Household head education (2-Secondary)  | 5.929                | 1.060     | 0.093   | 0.09**           | 0.03      | 0.003   |
| Household head education (3-University) | 2.71×10 <sup>6</sup> | 946.892   | 0.988   | 0.113***         | 0.02      | 0.000   |
| Household size                          | 1.17                 | 0.088     | 0.074   | 0.013            | 0.007     | 0.075   |
| Number of men in the household          | 0.692*               | 0.152     | 0.016   | -0.03*           | 0.013     | 0.016   |
| Pseudo R <sup>2</sup> (Nagelkerke)      | 0.135                |           |         |                  |           |         |
| Prob > Chi <sup>2</sup>                 | 0.003                |           |         |                  |           |         |

Number of observations: 359; AME = Average Marginal Effects, \* $p < 0.05$ , \*\* $p < 0.01$  and \*\*\* $p < 0.001$



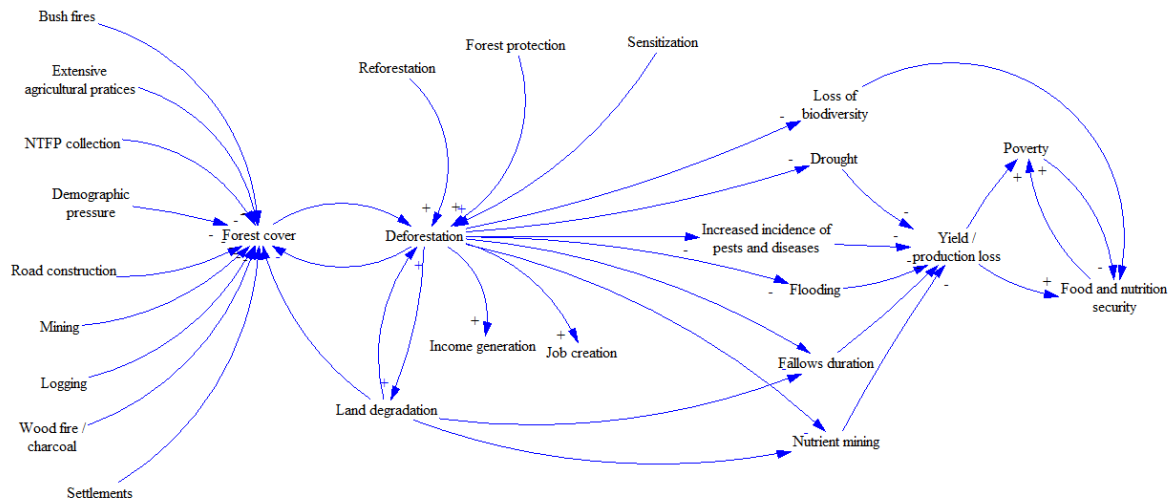

Figure S2. Causal loop diagram from focus group discussions examining drivers, consequences, control and mitigation strategies of deforestation and land degradation in south-western Cote d'Ivoire
